# Supplementary material for: Enrichment of C5a-C5aR axis predicts poor postoperative prognosis of patients with clear cell renal cell carcinoma
Source: PubMed Central journal article supplement (PMC5348365; doi:10.18632/oncotarget.13108), 2016-11-04
Supplement: oncotarget-07-80925-s001.pdf [file oncotarget-07-80925-s001.pdf]

## Enrichment of C5a-C5aR axis predicts poor postoperative prognosis of patients with clear cell renal cell carcinoma

### Supplementary Materials

**Supplementary Table S1: Association between C5a-C5aR status and patient characteristics**

| Characteristics        | Patients |      | C5a-C5aR status |              | P     |
|------------------------|----------|------|-----------------|--------------|-------|
|                        | n        | %    | Enriched        | Non-enriched |       |
| All patients           | 272      | 100  | 86              | 186          |       |
| Age, years*            |          |      |                 |              | 0.162 |
| ≤ 55                   | 134      | 49.3 | 37              | 97           |       |
| > 55                   | 138      | 50.7 | 49              | 89           |       |
| Gender                 |          |      |                 |              | 0.016 |
| Female                 | 84       | 30.9 | 18              | 66           |       |
| Male                   | 188      | 69.1 | 68              | 120          |       |
| Tumor size, cm*        |          |      |                 |              | 0.078 |
| ≤ 4                    | 154      | 56.6 | 42              | 112          |       |
| > 4                    | 118      | 43.4 | 44              | 74           |       |
| TNM stage <sup>#</sup> |          |      |                 |              | 0.168 |
| I                      | 168      | 61.8 | 45              | 123          |       |
| II                     | 22       | 8.1  | 8               | 14           |       |
| III                    | 64       | 23.5 | 25              | 39           |       |
| IV                     | 18       | 6.6  | 8               | 10           |       |
| Fuhrman grade          |          |      |                 |              | 0.134 |
| 1                      | 29       | 10.7 | 7               | 22           |       |
| 2                      | 200      | 73.5 | 59              | 141          |       |
| 3                      | 40       | 14.7 | 19              | 21           |       |
| 4                      | 3        | 1.1  | 1               | 2            |       |
| Necrosis               |          |      |                 |              | 0.024 |
| Absent                 | 234      | 86.0 | 68              | 166          |       |
| Present                | 38       | 14.0 | 18              | 20           |       |
| ECOG-PS                |          |      |                 |              | 0.540 |
| 0                      | 199      | 73.2 | 65              | 134          |       |
| ≥ 1                    | 73       | 26.8 | 21              | 52           |       |

\*Split at median; <sup>#</sup>TNM stage was identical to sole pT stage.

Abbreviations: ECOG-PS, Eastern Cooperative Oncology Group performance status.

**Supplementary Table S2: HR of C5a-C5aR in stratified subgroups**

| Stratified Subgroups | Overall Survival    |         | Recurrence-free Survival |       |
|----------------------|---------------------|---------|--------------------------|-------|
|                      | HR (95% CI)         | P       | HR (95% CI)              | P     |
| Age ≤ 55 yr          | 1.850 (0.865–3.957) | 0.113   | 1.809 (0.846–3.867)      | 0.127 |
| Age > 55 yr          | 2.936 (1.688–5.107) | < 0.001 | 2.458 (1.320–4.579)      | 0.005 |
| Size ≤ 4.0 cm        | 2.750 (1.372–5.511) | 0.004   | 2.951 (1.386–6.286)      | 0.005 |
| Size > 4.0 cm        | 2.206 (1.243–3.915) | 0.007   | 1.601 (0.863–2.970)      | 0.135 |
| Fuhrman 1+2          | 3.229 (1.891–5.514) | < 0.001 | 2.489 (1.399–4.429)      | 0.002 |
| Fuhrman 3+4          | 1.039 (0.470–2.295) | 0.925   | 1.005 (0.425–2.379)      | 0.990 |
| Necrosis absent      | 2.554 (1.523–4.281) | < 0.001 | 1.859 (1.046–3.304)      | 0.035 |
| Necrosis present     | 1.808 (0.757–4.319) | 0.183   | 2.332 (0.912–5.964)      | 0.077 |
| TNM I+II             | 2.064 (1.063–4.005) | 0.032   | 1.424 (0.731–2.772)      | 0.298 |
| TNM III+IV           | 2.660 (1.449–4.884) | 0.002   | 3.318 (1.555–7.080)      | 0.002 |
| ECOG-PS = 0          | 3.381 (1.805–6.334) | < 0.001 | 2.259 (1.194–4.273)      | 0.012 |
| ECOG-PS ≥ 1          | 2.355 (1.236–4.487) | 0.009   | 2.796 (1.338–5.841)      | 0.006 |

Abbreviations: HR, Hazard Ratio; CI, confidence interval; ECOG-PS, Eastern Cooperative Oncology Group performance status.

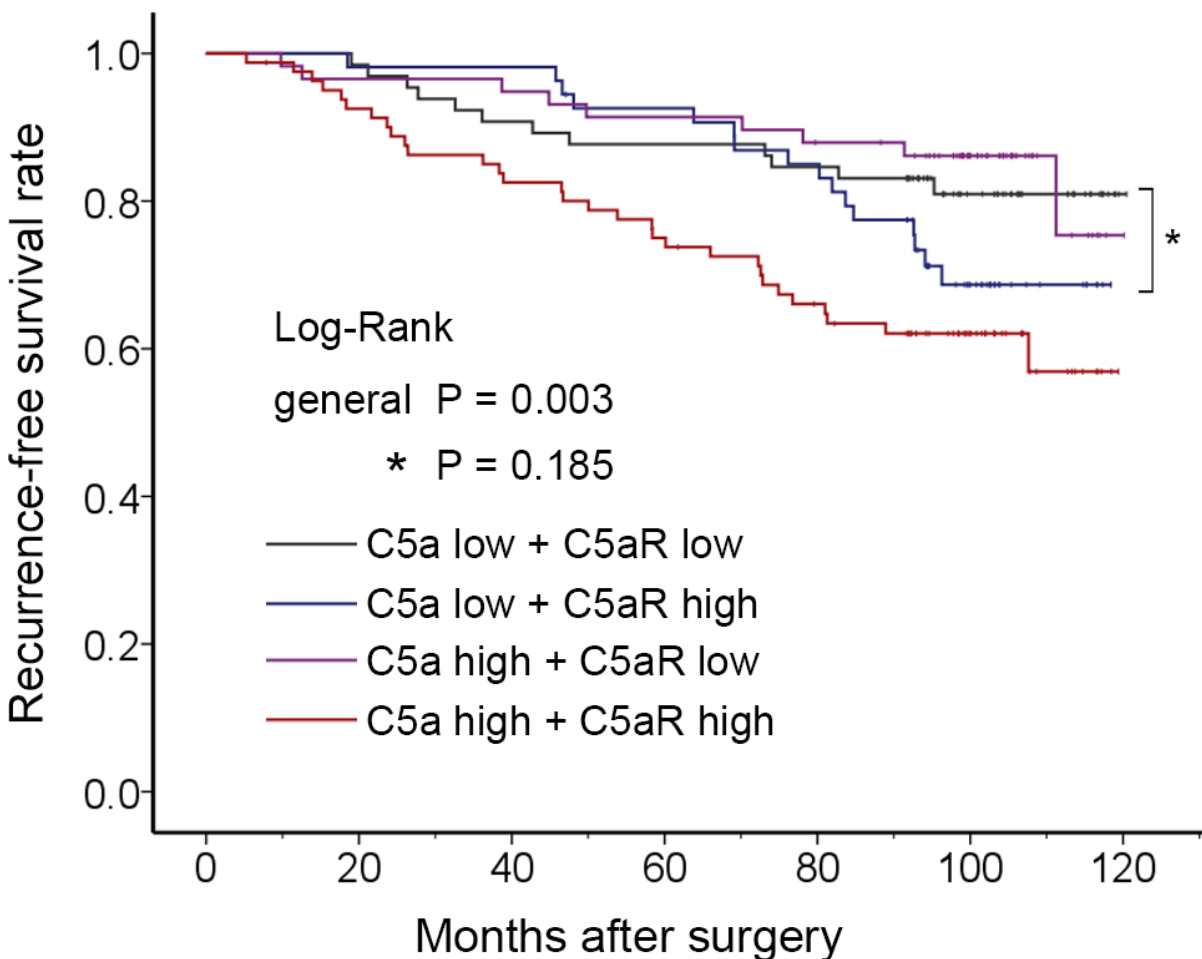

Supplementary Figure S1: C5a and C5aR level based comprehensive analyses for RFS.

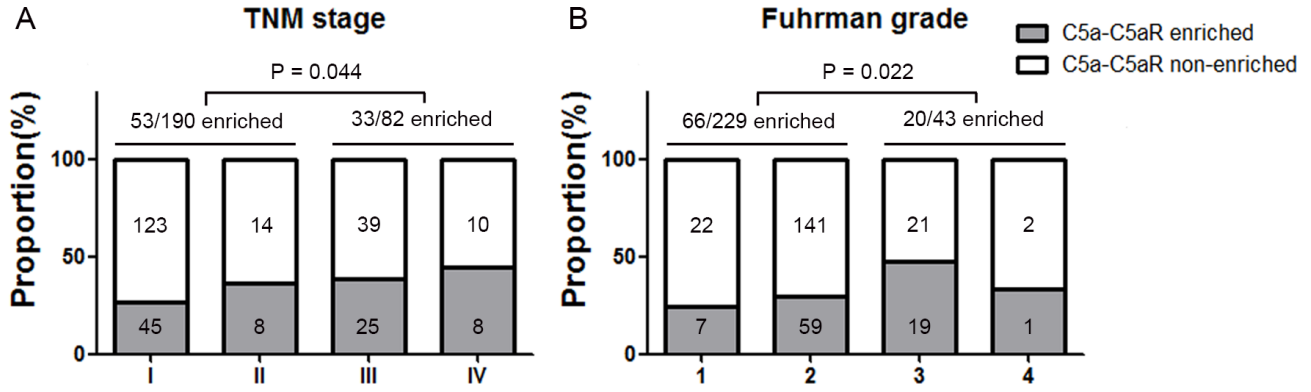

**Supplementary Figure S2: Distribution of C5a-C5aR status in different groups.** (A) C5a-C5aR status in different TNM stage patients; (B) C5a-C5aR status in different Fuhrman grade patients. Number of cases was labeled in each cube.

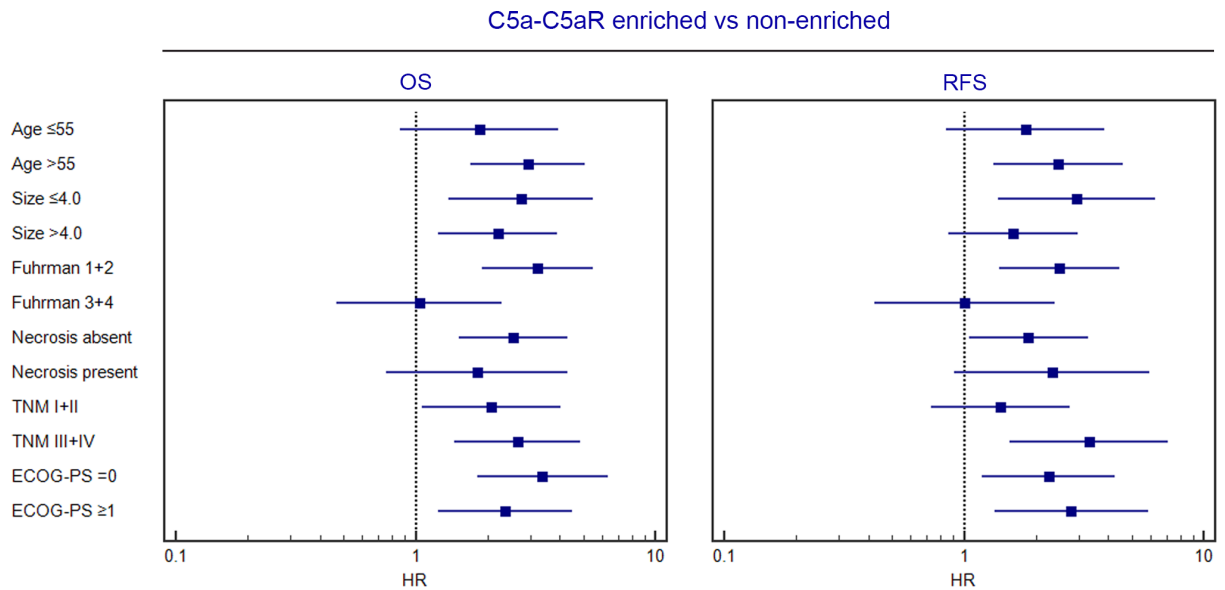

**Supplementary Figure S3: Stratified analyses of HR of C5a-C5aR for OS and RFS.**

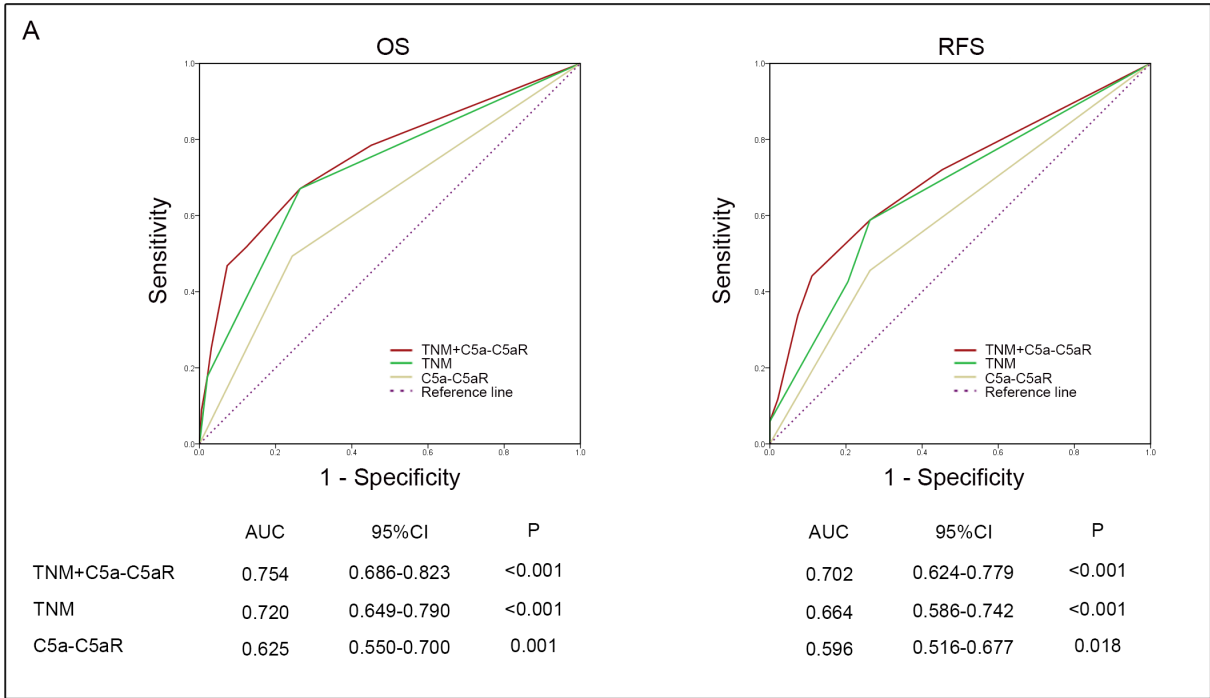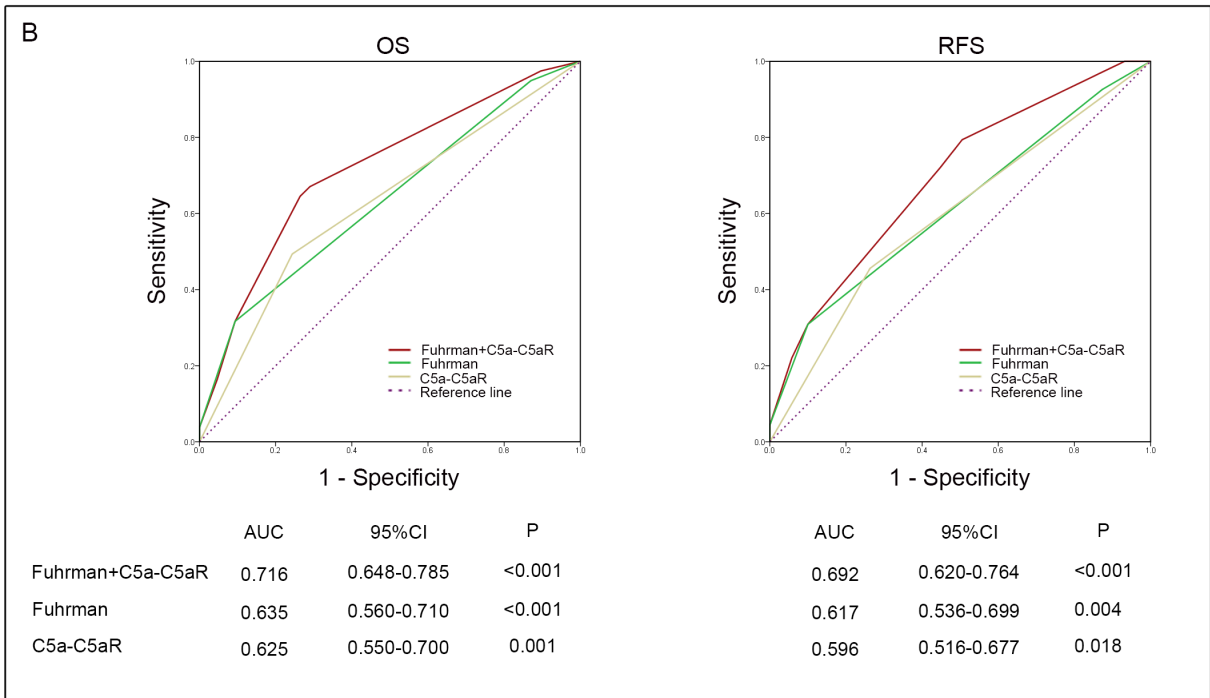

**Supplementary Figure S4: ROC and c-index analyses of integrating C5a-C5aR to traditional predictive systems. (A) Integrating to TNM stage system; (B) Integrating to Fuhrman grade system.**
